# Supplementary material
Source: PubMed Central journal article supplement (PMC9511609)
Supplement: NEJMc2210813_appendix.pdf [file NEJMc2210813_appendix.pdf]

## Supplementary Appendix

Supplement to: Herrera-Comoglio R, Lane S. Vaccine-induced immune thrombocytopenia and thrombosis after the Sputnik V vaccine. *N Engl J Med*. DOI: 10.1056/NEJMc2210813

This appendix has been provided by the authors to give readers additional information about the work.

# Vaccine-Induced Immune Thrombocytopenia and Thrombosis (VITT) after the Sputnik V vaccine

Herrera Comoglio Raquel, Samantha Lane

## TABLE OF CONTENTS:

1. **Source of this case report data: the ViVa study**
  - a. **Ethical approval**
  - b. **Informed consent**
  - c. **Patient's relative informed consent**
2. **Availability of data**
3. **Acknowledgements**

### 1. **Source of this case report data**

This case has been reported in the **ViVa** study (**V**igilance of **V**accines against COVID-19). The ViVa study is an observational study aiming to collect data on the efficacy and safety of SARS-CoV-2 vaccines through a survey addressed to any vaccinated people.

The ViVa study has been designed by Raquel Herrera Comoglio, (Pharmacovigilance Unit, National Hospital of Clinicas, School of Medical Sciences, National University of Cordoba, Argentina) and conducted in collaboration with the Centre of Information of Medicines, (CIME), School of Pharmacy and Chemistry, National University of Córdoba. directed by Sonia Uema.

**Ethical approval:** The ViVa study has received the ethical approval of the National Hospital of Clinicas Ethics Review Board and it has been registered at the local Ministry of Health.

**Informed Consent:** by virtually signing the ViVa study informed consent, respondents agreed to be contacted to provide more detailed information.

**Patient's Relative Informed Consent:** the patient's relative has signed the authorization to publish this case report.

2. **Availability of data:** clinical information is available upon request.
3. **Acknowledgements:**

To Biochemists Verónica Arrieta and Pablo Martínez, who provided the specifications of tests performed.
