# Supplementary material
Source: PubMed Central journal article supplement (PMC9511609)

**Disclosure Purpose:** 22-10813

### Summary of Interests

I do not have any interests to disclose at this time.

### Additional Questions:

- Are there other relationships or activities that readers could perceive to have influenced, or that give the appearance of potentially influencing, what you wrote in the submitted work?**  
No.
- What is the manuscript title?**  
Vaccine-Induced Immune Thrombocytopenia and Thrombosis (VITT) after the Sputnik V vaccine
- Are you the corresponding author?**  
Yes.
  - Please list the other authors' names here.**  
Samantha Lane

### Certification

I certify that the information provided in this disclosure is complete and accurate.

**Disclosure Purpose:** 22-10813

**Summary of Interests**

I do not have any interests to disclose at this time.

**Additional Questions:**

- Are there other relationships or activities that readers could perceive to have influenced, or that give the appearance of potentially influencing, what you wrote in the submitted work?**  
No.
- What is the manuscript title?**  
Vaccine-Induced Immune Thrombocytopenia and Thrombosis (VITT) after the Sputnik V Vaccine
- Are you the corresponding author?**  
No.

**Certification**

I certify that the information provided in this disclosure is complete and accurate.

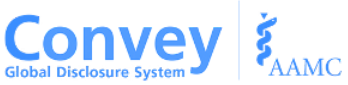

Supplement: NEJMc2210813_disclosures.pdf [file NEJMc2210813_disclosures.pdf]
